# Supplementary material
Source: PubMed Central journal article supplement (PMC524819)

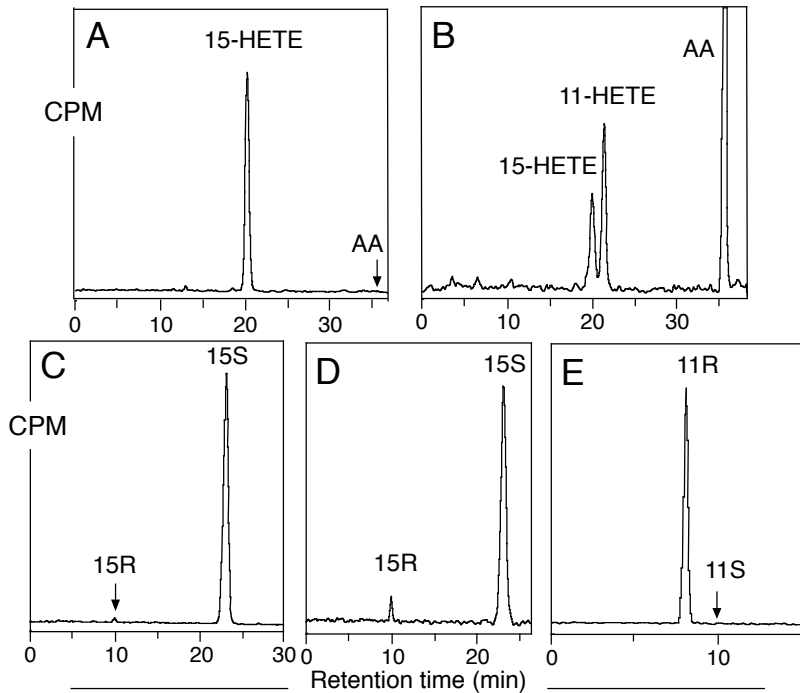

Supplement: pnas_101_44_15579__1.pdf [file pnas_101_44_15579__1.pdf]

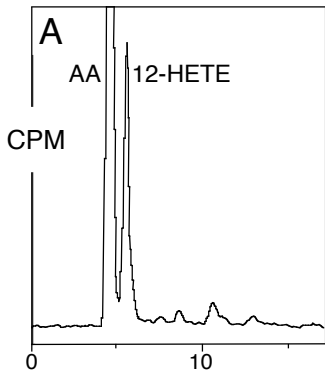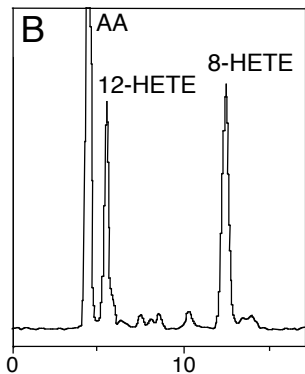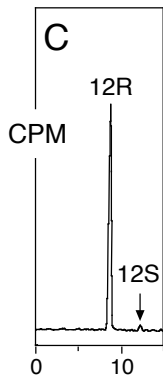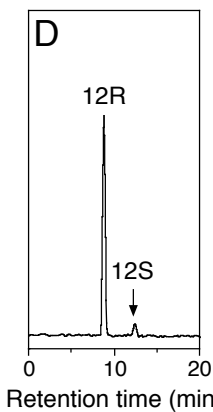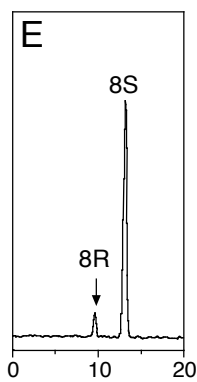

Supplement: pnas_101_44_15579__2.pdf [file pnas_101_44_15579__2.pdf]
